# Supplementary material for: Laser inscription of pseudorandom structures for microphotonic diffuser applications
Source: Royal Society of Chemistry journal article supplement (doi:10.1039/c8nr00529j), 2018-01-01
Supplement: c8nr00529j1.pdf [file c8nr00529j1.pdf]

## Supplementary Information

# Laser Inscription of Pseudorandom Structures for Microphotonic Diffuser Applications

*Tawfiq Alqurashi<sup>a, b, \*</sup>, Abdullah Alhosani<sup>a</sup>, Mahmoud Dauleh<sup>a</sup>, Ali K. Yetisen<sup>c</sup>, and Haider Butt<sup>a, \*</sup>*

*<sup>a</sup>School of Mechanical Engineering, University of Birmingham, Birmingham, B15 2TT, UK*

*<sup>b</sup>Department of Mechanical Engineering, School of Engineering, Shaqra University, Dawadmi, P.O. Box 90 Zip Code 11921, Saudi Arabia*

*<sup>c</sup>Harvard-MIT Division of Health Sciences and Technology, Harvard University and Massachusetts Institute of Technology, Cambridge, MA, 02139, USA*

Optical diffuser fabricated with continues CO2 laser, differ from other texture sources <sup>[1, 2]</sup>, has provided more data on this supplementary.

*Table 1. The global parameters used in the COMSOL 5.2A to carry out the CO2 laser simulation with their respective values.*

| Parameter                | Value   |
|--------------------------|---------|
| Radius of the substrate  | 0.003 m |
| Height of the substrate  | 0.004 m |
| Total time of simulation | 0.002 s |

|                      |                        |
|----------------------|------------------------|
| Ablation temperature | 837.15 K               |
| Density              | 2530 kg/m <sup>3</sup> |
| Specific heat        | 750 J/(kg·K)           |
| Thermal conductivity | 1.12 W/(m·K)           |
| Power of beam        | 24 W                   |
| Laser beam spot      | 2E-4 m                 |

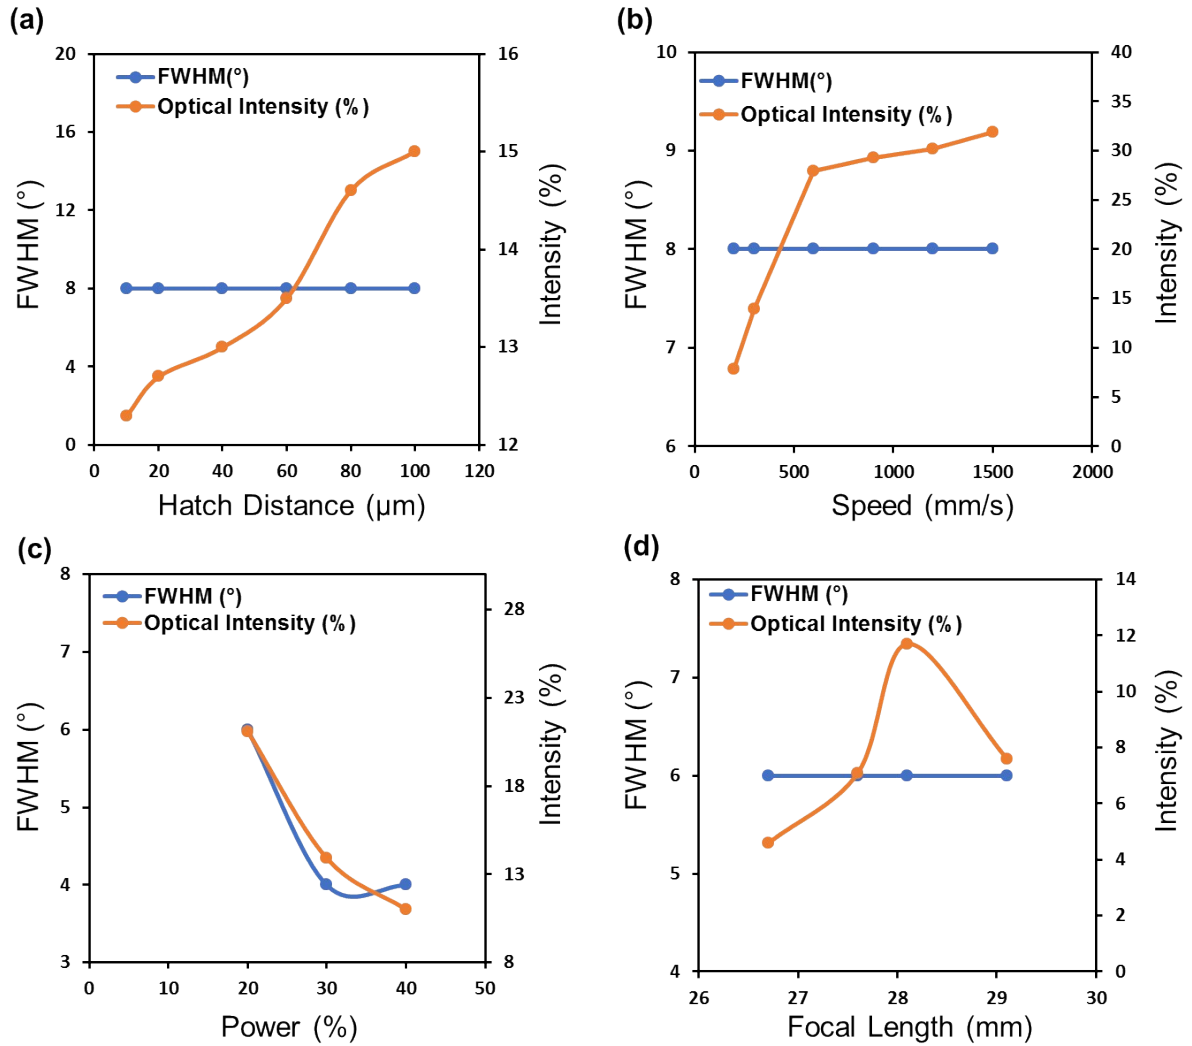

FIG. S1. Graphs showing the effect of changing the different laser parameters on the diffusion angle (FWHM) and the optical intensity of the transmitted light, one parameter was altered while fixing the other parameters for each experiment. (a) Hatch Distance ( $\mu\text{m}$ ). (b) Scanning speed (mm/s). (c) Laser power (% of 60 W). (d) Focal length (mm), the minimum laser spot diameter is provided at 28.1 mm.

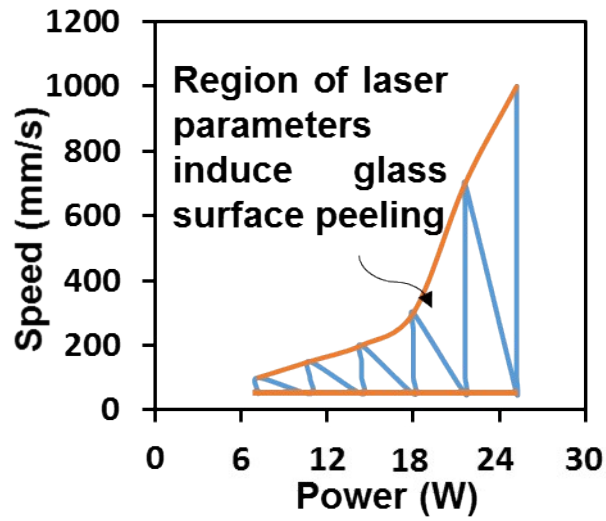

FIG. S2. A prediction model of CO2 laser induced glass surface peeling.

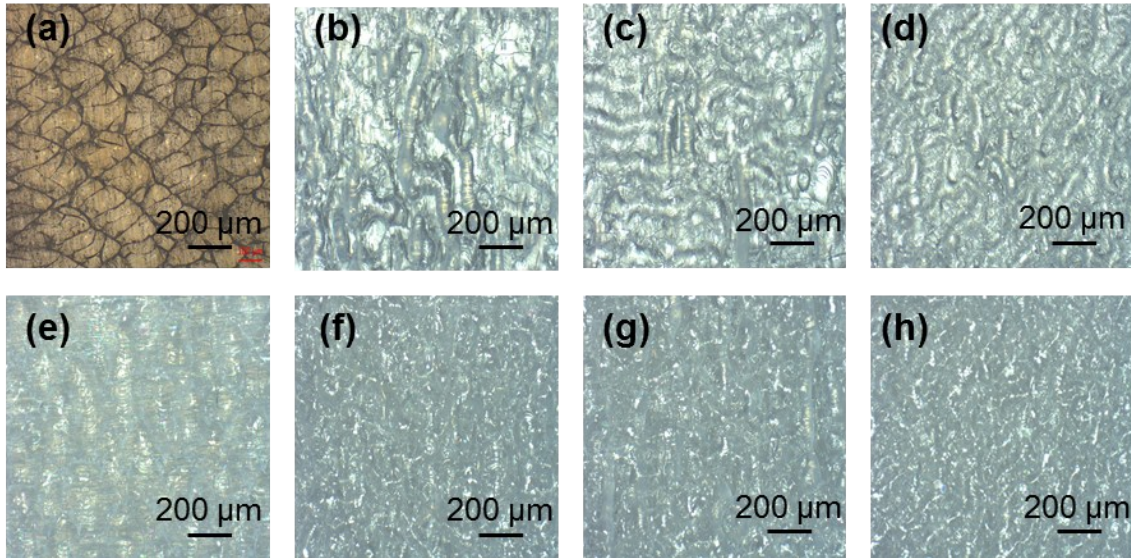

FIG. S3. Microscopic images (x5) of the fabricated diffusers using different surface relief structures, the specifications of the laser fabrication parameters and number of diffuser surfaces are detailed in Table 1. (a) Sample (S1), (b) Sample (S2), (c) Sample (S3), (d) Sample (S4), (e) Sample (S5), (f) Sample (S6), (g) Sample (S7), (h) Sample (S8).

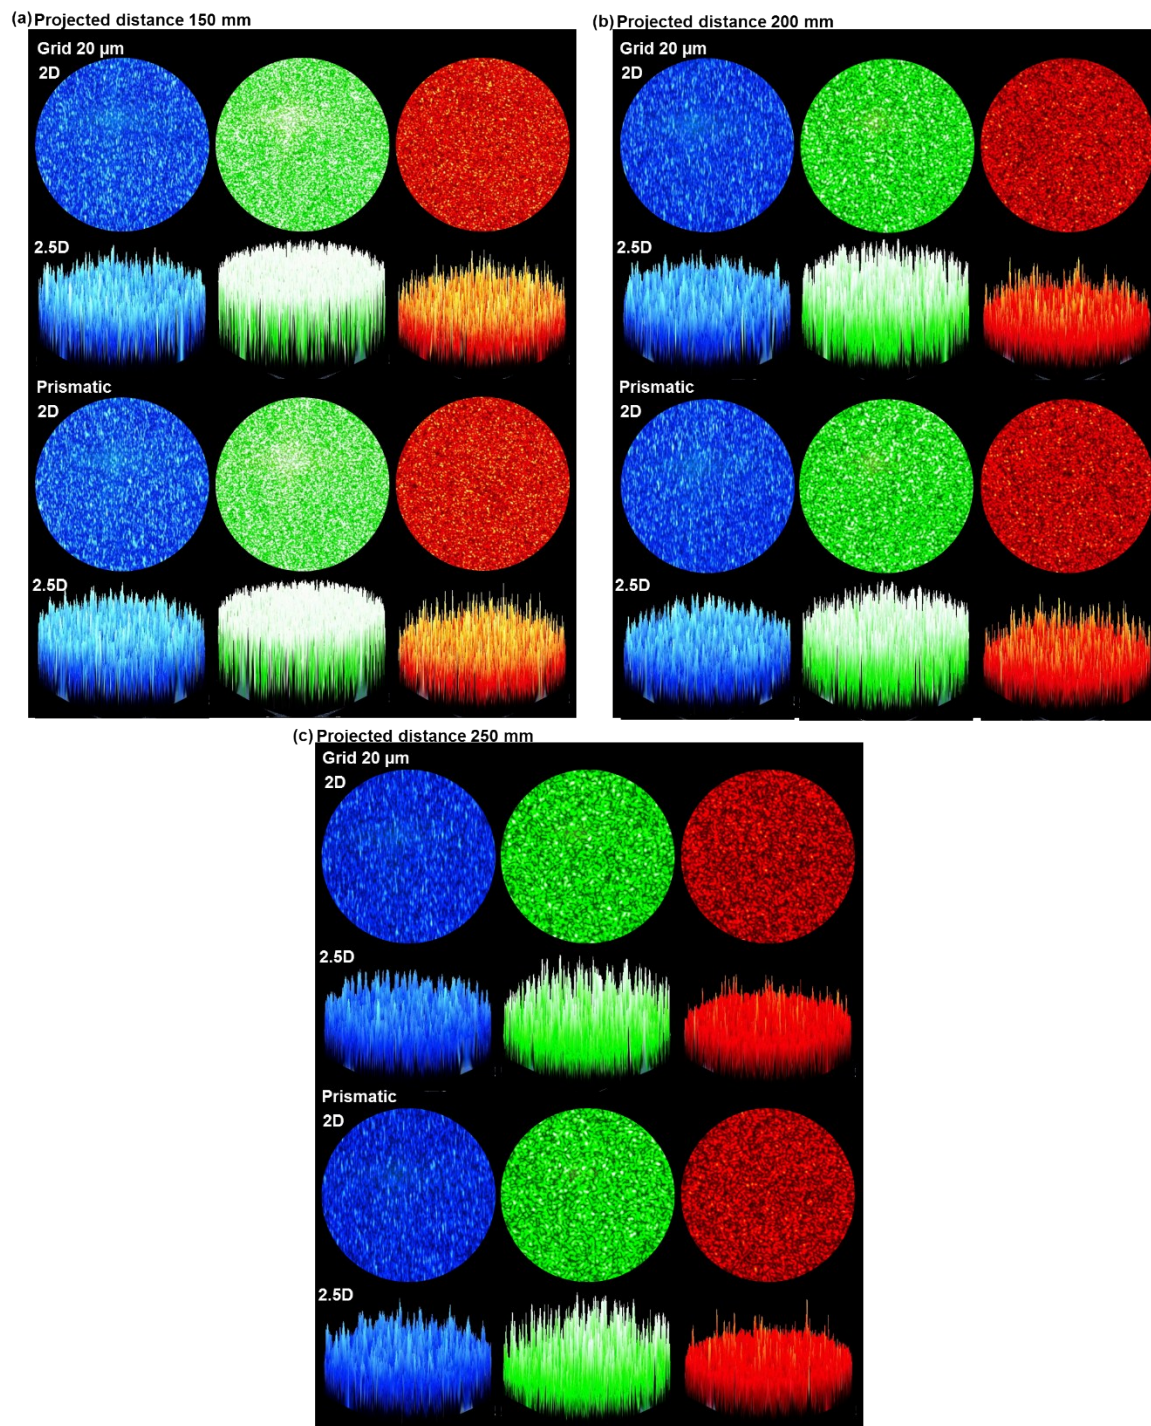

FIG. S4. The recorded image of speckle pattern at different projected distance (a) 150mm, (b) 200mm and (c) 250 mm for Grid 20  $\mu\text{m}$  and prismatic diffuser with varying laser wavelength (450, 533 and 633 nm)

1. Alqurashi, T., et al., *Nanosecond pulsed laser texturing of optical diffusers*. AIP Advances, 2017. **7**(2): p. 025313.
2. Alqurashi, T., et al., *Femtosecond laser directed fabrication of optical diffusers*. RSC Advances, 2017. **7**(29): p. 18019-18023.
